# Supplementary material for: Ability of Delta Radiomics to Predict a Complete Pathological Response in Patients with Loco-Regional Rectal Cancer Addressed to Neoadjuvant Chemo-Radiation and Surgery
Source: MDPI journal article supplement (doi:10.3390/cancers14123004), 2022-06-18
Supplement: s1 [file s1]

## SUPPLEMENTARY MATERIALS

**Table S1.** Texture analysis parameters calculated with Lifex Software, and corresponding description.

| Type of radiomics Feature                                                                                                  | Radiomics Feature Name | Description                                                                                       |
|----------------------------------------------------------------------------------------------------------------------------|------------------------|---------------------------------------------------------------------------------------------------|
| <b>Indices from Histogram:</b><br>provides informations derived from global histogram analysis                             | Volume.ml              | Measures the volume in voxels or millilitre                                                       |
|                                                                                                                            | Skewness               | measures the asymmetry of the gray-level distribution in the histogram.                           |
|                                                                                                                            | Kurtosis               | measures whether the gray-level distribution is peaked or flat relative to a normal distribution. |
|                                                                                                                            | Entropy                | measures the randomness of the distribution                                                       |
|                                                                                                                            | Energy                 | measures the uniformity of the distribution                                                       |
| <b>Indices from Sphericity</b>                                                                                             | Sphericity             | Measures how spherical a Volume of Interest is                                                    |
|                                                                                                                            | Compacity              | Measures the degree to which the Volume of Interest is compact                                    |
| <b>Co-occurrence Matrix (GLCM):</b><br>takes into account the arrangements of pairs of voxels to extract textural indices. | GLCM.homogeneity       | Homogeneity of gray-level voxel pairs                                                             |
|                                                                                                                            | GLCM.energy            | Uniformity of gray-level voxel pairs.                                                             |
|                                                                                                                            | GLCM.contrast          | Local variations in the GLCM.                                                                     |
|                                                                                                                            | GLCM.correlation       | Linear dependency of gray-levels in GLCM.                                                         |
|                                                                                                                            | GLCM.entropy           | Randomness of gray-level voxel pairs.                                                             |
|                                                                                                                            | GLCM.dissimilarity     | Variation of gray-level voxel pairs.                                                              |

**Table S2.** Reliability analysis of TA parameters.

| TA Parameter     | T2-MRI<br>ICC (single measure) | DWI-MRI<br>ICC (single measure) | ADC-MRI<br>ICC (single measure) |
|------------------|--------------------------------|---------------------------------|---------------------------------|
| Volume.ml        | 0.970                          | 0.887                           | 0.881                           |
| Skewness         | 0.743                          | 0.912                           | 0.826                           |
| Kurtosis         | 0.387                          | 0.925                           | 0.943                           |
| Entropy          | 0.588                          | 0.735                           | 0.873                           |
| Energy           | 0.584                          | 0.356                           | 0.825                           |
| Sphericity       | 0.847                          | 0.393                           | 0.868                           |
| Compacity        | 0.711                          | 0.772                           | 0.756                           |
| GLCM.homogeneity | 0.757                          | 0.726                           | 0.806                           |
| GLCM.energy      | 0.688                          | 0.234                           | 0.590                           |
| GLCM.contrast    | 0.238                          | 0.807                           | 0.727                           |
| GLCM.correlation | 0.656                          | 0.846                           | 0.431                           |
| GLCM.entropy     | 0.811                          | 0.736                           | 0.866                           |

|                    |       |       |       |
|--------------------|-------|-------|-------|
| GLCM.dissimilarity | 0.715 | 0.838 | 0.745 |
|--------------------|-------|-------|-------|

**Table S3.** Logistic regression analysis performed on both Training Dataset and Validation Dataset.

| Logistic Regression Analysis |               |         |       |                   |                      |
|------------------------------|---------------|---------|-------|-------------------|----------------------|
| Endpoint                     | Parameter     | p-value | B     | OR (95% CI)       | Dataset              |
| TRG 1                        | ADC GLCM      |         |       |                   |                      |
|                              | Delta Entropy | <0.001  | -1.97 | 0.14 (0.03-0.54)  | Training dataset     |
| TRG 1                        | ADC GLCM      |         |       |                   |                      |
|                              | Delta Entropy | 0.001   | -2.48 | 0.08 (0.01-0.73)  | Validation Dataset 1 |
| TRG 1                        | ADC GLCM      |         |       |                   |                      |
|                              | Delta Entropy | 0.008   | -3.43 | 0.06 (0.01-0.052) | Validation Dataset 2 |

**Table S4.** Characteristics of the ROC Curves. 2LL: 2 log-likelihood; R<sup>2</sup>: Nagelkerke R<sup>2</sup>, AUC: Area Under the Curve of the ROC; SE: standard error; HL: Hosmer–Lemeshow.

|                   | Training Dataset | Validation Dataset 1 | Validation Dataset 2 |
|-------------------|------------------|----------------------|----------------------|
| -2LL              | 28.46            | 19.01                | 17.23                |
| R <sup>2</sup>    | 0.477            | 0.507                | 0.469                |
| AUC               | 0.874            | 0.926                | 0.888                |
| SE                | 0.058            | 0.048                | 0.089                |
| HL X <sup>2</sup> | 3.92             | 4.66                 | 8.31                 |
| HL p-value        | 0.77             | 0.79                 | 0.40                 |
